# Supplementary material for: Whole brain comparative anatomy using connectivity blueprints
Source: eLife journal article supplement (doi:10.7554/elife.35237), 2018-05-11
Supplement: supp [file elife-35237-supp-v1.zip]

Archive with 1 entries (1 files):
- elife_poa_e35237_Transparent_Reporting_File.pdf
